# Supplementary material for: Enhanced ‘in situ’ catalysis via microwave selective heating: catalytic chain transfer polymerisation
Source: Royal Society of Chemistry journal article supplement (doi:10.1039/c4ra00907j), 2014-01-01
Supplement: c4ra00907j1.pdf [file c4ra00907j1.pdf]

## Extra Scientific Information for “Enhanced ‘In-situ’ Catalysis *via* Microwave Selective Heating: Catalytic Chain Transfer Polymerisation”

Kevin Adlington,<sup>a,b</sup> Robert McSweeney,<sup>b</sup> Georgios Dimitrakis,<sup>a</sup> Samuel W. Kingman,<sup>a</sup> John P. Robinson,<sup>a</sup> Derek J. Irvine<sup>a,b\*</sup>

<sup>a</sup> National Centre for Industrial Microwave Processing, Process and Environmental Research Division, Faculty of Engineering, and <sup>b</sup> School of Chemistry, University of Nottingham, Nottingham, NG7 2RD, UK.

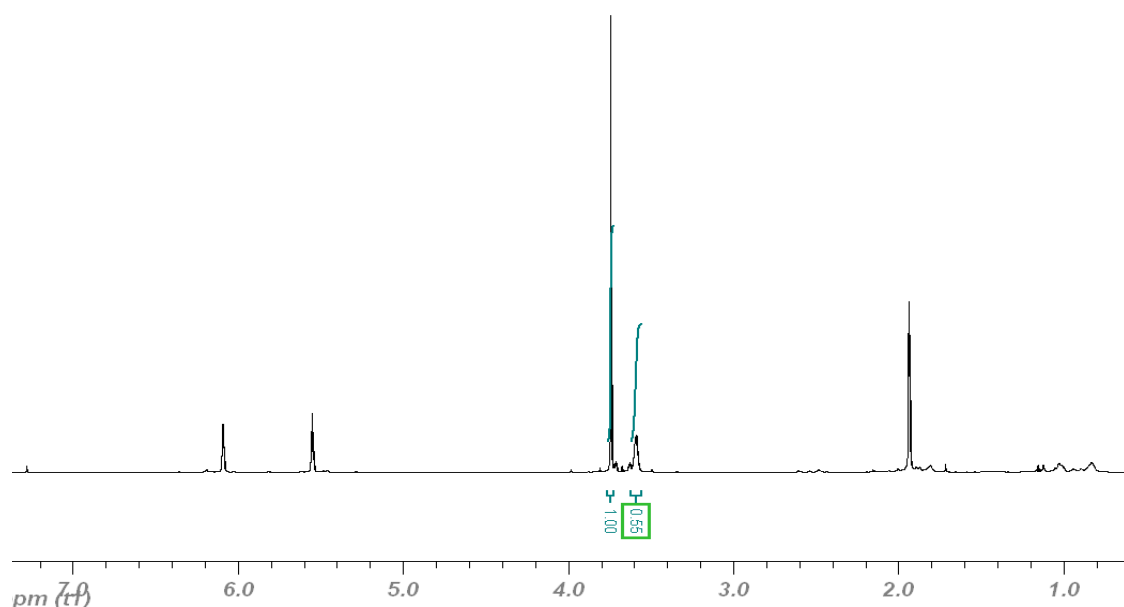

ESI Figure S1 - NMR data for bulk CCTP of MMA using 600 ppm of 'in-situ' dmgl catalyst, 0.5 wt% AIBN for 2 hours at 80 °C with 30 min pre-stir at RT

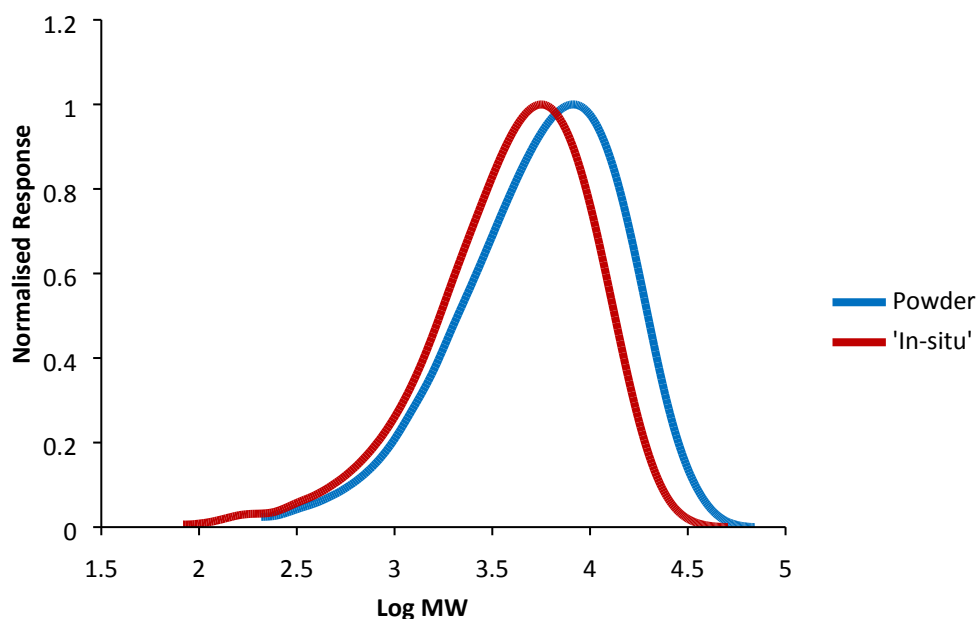

ESI Figure S2 - Comparison of the GPC traces of the product polymer synthesised using CoI<sub>2</sub> and dmgl in (a) 'in-situ' and (b) pre-synthesised catalyst reactions

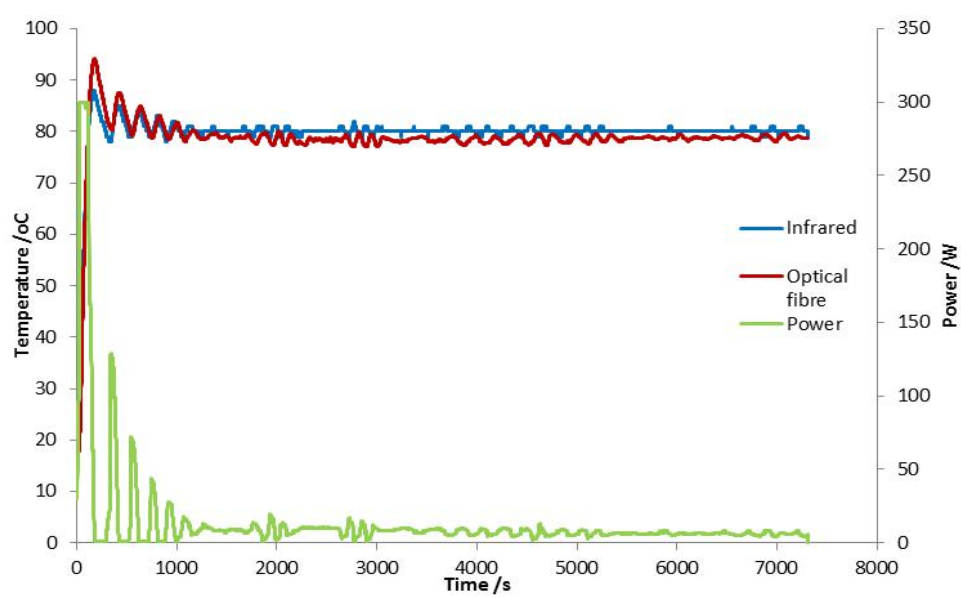

ESI Figure S3 - Heating profile for MWH reaction of MMA bulk using 600 ppm '*in-situ*' catalyst
